# Supplementary material for: Radiolarian assemblages in the shelf area of the East China Sea and Yellow Sea and their ecological indication of the Kuroshio Current derivative branches
Source: PeerJ. 2020 Sep 18;8:e9976. doi: 10.7717/peerj.9976 (PMC7505074; doi:10.7717/peerj.9976)
Supplement: Table S1 [file peerj-08-9976-s001.xlsx]

## Sheet: Sediment samples
Environmental parameters	DH3-1	DH3-3	DH4-1	DH4-3	DH4-5	DH5-2	DH5-4	DH5-5	DH6-2	DH6-4	DH6-5	DH7-2	DH7-4	DH8-1	DH8-3	DH9-1	DH9-3	DH11-1	DH11-3	DH11-5	3000-1	3000-3	3000-5	3000-7	3100-1	3100-3	3100-5	3100-7	3300-4	3300-6	3400-3	3400-6	3400-8	3500-2	3500-4	3500-6	3500-8	3500-10	3600-4	3600-6	3600-8	3700-1	CJ-01	CJ-03	CJ-05	B-01	B-03	B-05	B-07
Lon (E)	124.2	125.08	123.11	123.8	124.63	122.87	123.67	124.07	122.43	123.22	123.61	122.14	122.69	121.17	121.83	120.83	121.45	120.03	120.46	120.88	122.5	123.5	124.5	125.5	122.5	123.5	124.5	125.5	123	124	121.5	123	124	120	121	122	123	124	122	123	124	123	122.5	123.49	124.5	121.71	121.96	122.23	122.45
Lat (N)	29.75	29.28	29.47	29.09	28.64	28.9	28.41	28.17	28.29	27.79	27.55	27.63	27.3	27.38	26.99	26.77	26.41	25.94	25.71	25.49	30	30	30	30	31	31	31	31	33	33	34	34	34	35	35	35	35	35	36	36	36	37	31.67	32	32.33	38.8	38.42	38.05	37.67
Depth (m)	77	78	63	81	98	65	75	94	66	89	96	82	96.4	32.9	89.1	52.1	80.6	48	64	87.3	22	65	68	62	21	56	51	65	33	52	18	68	73	27	40	52	73	80	42	70	78	29	34	42	44	58	50	51	28
Chlor_a (mg/m³)	0.901072	0.701271	2.25834	0.824992	0.584079	1.75064	0.646416	0.539291	1.70318	0.518415	0.408642	0.785357	0.49379	3.38532	0.659437	1.86779	0.594479	2.93994	1.01389	0.620653	5.61753	1.62756	0.886785	0.842842	5.48369	2.59221	1.74564	1.21761	3.02201	2.11053	3.91703	0.953806	1.081	2.15983	1.68185	1.29441	1.00568	0.917719	1.81871	1.05304	1.00045	2.66771	5.15439	3.54147	2.59089	2.73886	1.77718	1.60596	2.7444
POC (mg/m³)	161.537	153.025	245.198	172.282	138.096	207.63	128.689	114.726	207.663	112.263	96.045	135.507	106.599	303.038	124.548	217.182	123.414	289.803	162.883	118.254	354.157	210.159	177.345	161.798	386.856	273.713	240.85	186.399	304.554	278.252	330.3	185.251	209.504	312.5	275.197	294.949	233.311	211.3	357.303	299.208	239.448	316.653	360.813	308.413	277.006	410.016	364.383	316.406	339.893
Sand (%)	0.68134	0.62033	0.62346	0.49678	0.60075	0.19914	0.74669	0.6431	0.29516	0.67629	0.8467	0.11171	0.73363	0	0.17968	0	0.35475	0	0.02321	0.19123	0.26255	0.59122	0.64249	0.72872	0.00202	0.64596	0.69635	0.07718	0.56425	0.19974	0.25438	0.04523	0.25951	0.56607	0.62971	0.16094	0.00934	0.13753	0.11389	0	0	0.04939	0.58484	0.67663	0.45213	0.65975	0.36375	0.00151	0.12877
Silt (%)	0.2179	0.2681	0.26054	0.35759	0.27702	0.5516	0.19429	0.25872	0.50652	0.24123	0.11984	0.63094	0.20396	0.73343	0.60806	0.72988	0.53174	0.68929	0.79546	0.63357	0.59993	0.27821	0.26261	0.20623	0.77608	0.27813	0.23333	0.68992	0.32661	0.54661	0.64685	0.72001	0.52378	0.31539	0.29091	0.60457	0.6752	0.62298	0.61893	0.60319	0.68827	0.78545	0.32109	0.24737	0.42399	0.26017	0.50178	0.74573	0.74782
Clay (%)	0.10076	0.11157	0.116	0.14563	0.12223	0.24926	0.05902	0.09818	0.19832	0.08248	0.03346	0.25735	0.06241	0.26657	0.21226	0.27012	0.11351	0.31071	0.18133	0.1752	0.13752	0.13057	0.0949	0.06505	0.2219	0.07591	0.07032	0.2329	0.10914	0.25365	0.09877	0.23476	0.21671	0.11854	0.07938	0.23449	0.31546	0.23949	0.26718	0.39681	0.31173	0.16516	0.09407	0.076	0.12388	0.08008	0.13447	0.25276	0.12341
Mz (φ)	3.53669	3.80145	3.81587	4.30036	3.90977	5.71051	3.2925	3.67426	5.27332	3.59938	2.86966	6.15028	3.4339	6.67304	5.76971	6.73755	4.79163	6.94018	6.08565	5.46792	5.12111	3.98838	3.70083	3.32245	6.46464	3.71221	3.4313	6.13562	3.90546	5.77063	4.91302	6.32165	5.35517	4.03762	3.9079	5.85488	6.7855	5.90732	6.13343	7.30309	6.89825	5.78795	3.85112	3.51955	4.42558	3.58651	4.71929	6.5722	5.33086
SST (︒C)	20.2658	21.1455	20.2653	20.961	21.4914	20.7514	21.5975	21.8832	21.2365	22.5685	22.9618	21.9155	23.0765	19.8093	22.2783	20.19	22.6913	20.7171	21.9199	23.2919	18.6908	19.8969	19.9456	20.1839	17.3391	18.6397	18.4988	18.7858	15.9689	16.7795	14.6027	15.9608	16.3545	16.387	15.3884	15.4366	15.7271	15.6076	14.8758	15.1263	15.291	14.06	16.4869	17.1014	16.9341	12.8048	12.8755	13.0952	13.3387
SSS (psu)	33.4235	33.8214	32.7855	33.5867	33.8873	33.0611	33.8021	33.9431	33.1535	33.9995	34.1288	33.584	34.0852	32.6237	33.6893	32.8676	33.7189	32.3345	33.2235	33.6034	26.6101	32.8937	33.2893	33.334	22.8674	31.1024	32.3839	32.7335	31.3949	31.5065	31.8385	31.9222	32.2698	31.9313	31.4501	31.5661	31.9624	32.2328	31.2685	31.7386	32.1252	31.334	25.118	31.1693	31.6606	31.0506	31.13	31.0805	31.0514
Silicate (µmol/l)	6.65446	5.42592	9.17708	6.59683	6.48577	8.6682	6.84335	6.98669	7.73834	5.7219	5.36167	5.63255	4.06144	8.85176	5.45186	8.84148	5.96684	7.97287	6.80025	5.71538	11.4418	8.83425	6.42814	5.89344	14.5987	11.4711	9.40557	9.05765	11.3978	12.0387	5.5675	6.98846	9.33232	5.61877	5.36241	4.81307	5.48327	7.70261	6.02528	5.77625	7.27046	6.41349	15.4993	13.3362	11.6106	8.72575	8.51198	8.71326	8.09077
Nitrate (µmol/l)	1.79503	0.991652	2.90035	1.82966	1.1828	2.63137	1.6738	1.35451	2.48755	1.78581	1.46642	1.97634	1.60397	2.24962	1.73055	2.29896	1.67322	2.0566	1.75836	1.34458	4.13386	2.80811	1.77718	1.59773	7.62401	4.47811	2.8722	2.37413	4.07984	3.32999	2.64514	1.45765	1.6197	1.17107	1.00352	0.904643	1.05297	1.32397	0.864358	1.00169	1.30292	1.08684	8.56019	5.734	3.84071	0.987748	0.986188	0.992022	0.985558
Phosphate (µmol/l)	0.211134	0.166043	0.280367	0.224115	0.201985	0.272102	0.251711	0.254686	0.256047	0.223037	0.224458	0.208973	0.176218	0.248361	0.184678	0.23647	0.204565	0.217709	0.229898	0.234086	0.362178	0.260595	0.208362	0.183848	0.444053	0.336061	0.319077	0.290237	0.285751	0.272292	0.293602	0.247457	0.264921	0.146355	0.405599	0.414571	0.332056	0.330774	0.54884	0.504137	0.404958	0.605399	0.423948	0.351225	0.28874	0.604594	0.624821	0.65302	0.639808
Oxygen (ml/l)	5.38612	5.27736	5.47044	5.34794	5.26928	5.42669	5.24699	5.19679	5.36595	5.12501	5.06602	5.28256	5.09743	5.4784	5.20321	5.36191	5.05683	5.38499	5.07334	4.74202	5.70391	5.45394	5.411	5.39045	5.82016	5.64702	5.61742	5.56482	5.95987	5.81939	6.03609	5.91355	5.83871	6.00848	6.07811	6.02029	5.96079	5.92889	6.19435	6.09973	6.00587	6.27026	5.90776	5.82156	5.77804	6.35664	6.43067	6.45656	6.4163
[truncated: 10 more columns]
