# Supplementary material for: Radiolarian assemblages in the shelf area of the East China Sea and Yellow Sea and their ecological indication of the Kuroshio Current derivative branches
Source: PeerJ. 2020 Sep 18;8:e9976. doi: 10.7717/peerj.9976 (PMC7505074; doi:10.7717/peerj.9976)
Supplement: Table S2 [file peerj-08-9976-s002.xlsx]

## Sheet: Surface Sediment Samples
Radiolarian counting data of surface sediment samples
Taxon name	Family	Order	DH3-1	DH3-3	DH4-1	DH4-3	DH4-5	DH5-2	DH5-4	DH5-5	DH6-2	DH6-4	DH6-5	DH7-2	DH7-4	DH8-1	DH8-3	DH9-1	DH9-3	DH11-1	DH11-3	DH11-5	3000-1	3000-3	3000-5	3000-7	3100-1	3100-3	3100-5	3100-7	3300-4	3300-6	3400-3	3400-6	3400-8	3500-2	3500-4	3500-6	3500-8	3500-10	3600-4	3600-6	3600-8	3700-1	CJ-01	CJ-03	CJ-05	B-01	B-03
Acanthocorys castanoides Tan and Tchang, 1976	Plagiacanthidae	Nassellaria	0	0	0	0	0	0	0	0	0	0	0	0	1	0	0	0	0	0	0	0	0	0	0	0	0	0	0	0	0	0	0	0	0	0	0	0	0	0	0	0	0	0	0	0	0	0	0
Acanthodesmia vinculata (Müller, 1858)	Trissocyclidae	Nassellaria	0	2	0	1	3	4	2	0	2	0	0	2	7	0	3	0	2	0	0	2	0	0	0	0	0	0	0	0	0	0	0	0	0	0	0	0	0	0	0	0	0	0	0	0	0	0	0
Acrosphaera lappacea (Haeckel, 1887)	Collosphaeridae	Collodaria	0	0	0	0	0	0	0	0	0	0	0	1	0	0	0	0	0	0	0	1	5	0	0	0	0	0	0	0	0	0	0	0	0	0	0	0	0	0	0	0	0	0	0	0	0	0	0
Acrosphaera spinosa Haeckel, 1862	Collosphaeridae	Collodaria	0	0	0	0	3	0	0	1	1	1	1	3	1	0	3	0	3	0	0	0	5	0	0	0	0	1	0	0	0	0	0	0	0	0	0	0	0	0	0	0	0	0	0	0	0	0	0
Actinomma leptodermum (Jørgensen, 1900)	Actinommidae	Spumellaria	0	0	0	0	0	0	0	0	0	0	0	0	0	0	1	0	3	0	0	0	0	0	0	0	0	0	0	0	0	0	0	0	0	0	0	0	0	0	0	0	0	0	0	0	0	0	0
Actinomma arcadophorum Haeckel, 1887	Actinommidae	Spumellaria	0	0	0	0	0	0	0	1	0	0	0	0	5	0	5	0	2	0	0	3	1	0	0	0	0	0	0	0	0	0	0	0	0	0	0	0	0	0	0	0	0	0	0	0	0	0	0
Amphibrachium sponguroides Haeckel, 1887	Spongodiscidae	Spumellaria	0	0	0	0	0	0	0	0	0	0	1	0	0	0	0	0	0	0	0	0	0	0	0	0	0	0	0	0	0	0	0	0	0	0	0	0	0	0	0	0	0	0	0	0	0	0	0
Amphirhopalum ypsilon Haeckel, 1887	Spongodiscidae	Spumellaria	0	0	0	0	0	1	0	1	0	0	0	1	0	0	0	1	1	0	2	1	0	0	0	0	0	0	0	0	0	0	0	0	0	0	0	0	0	0	0	0	0	0	0	0	0	0	0
Amphispyris bria Tan et Su, 1982	Trissocyclidae	Nassellaria	0	0	0	0	0	0	0	1	0	1	0	0	0	0	0	0	0	0	0	1	0	0	0	1	0	0	0	0	0	0	0	0	0	0	0	0	0	0	0	0	0	0	0	0	0	0	0
Amphispyris costata Haeckel, 1887	Trissocyclidae	Nassellaria	0	0	0	0	0	0	0	0	0	0	0	0	1	0	0	0	0	0	0	0	0	0	0	0	0	0	0	0	0	0	0	0	0	0	0	0	0	0	0	0	0	0	0	0	0	0	0
Amphispyris sp.	Trissocyclidae	Nassellaria	0	0	0	0	0	0	0	0	0	0	0	0	4	0	2	0	0	0	0	0	0	0	0	0	0	0	0	0	1	0	0	0	0	0	0	0	0	0	0	0	0	0	0	0	0	0	0
Anthocyrtidium angulare Nigrini, 1971	Pterocorythidae	Nassellaria	0	0	0	0	0	0	0	0	0	0	0	0	0	0	1	0	0	0	0	0	0	0	0	0	0	0	0	0	0	0	0	0	0	0	0	0	0	0	0	0	0	0	0	0	0	0	0
Anthocyrtidium ophirense (Ehrenberg，1872)	Pterocorythidae	Nassellaria	0	0	0	0	0	0	0	0	0	0	0	0	0	0	2	0	1	0	0	0	0	0	0	0	0	0	0	0	0	0	0	0	0	0	0	0	0	0	0	0	0	0	0	0	0	0	0
Anthocyrtidium zanguebaricum (Ehrenberg, 1872)	Pterocorythidae	Nassellaria	0	0	0	0	0	1	0	0	1	0	0	0	0	0	0	0	1	0	0	0	0	0	0	0	0	0	0	0	0	0	0	0	0	0	0	0	0	0	0	0	0	0	0	0	0	0	0
Botryocyrtis scutum (Harting, 1863)	Cannobotryidae	Nassellaria	2	0	0	0	0	1	0	0	0	1	0	1	0	0	0	0	5	0	4	3	0	0	1	0	0	0	0	0	0	0	1	0	0	0	0	0	0	0	0	0	0	0	0	0	0	0	0
Botryostrobus aquilonaris (Bailey, 1856)	Artostrobiidae	Nassellaria	0	0	0	0	0	0	0	0	0	0	0	0	0	0	0	0	1	0	1	0	3	0	0	0	0	0	0	0	0	0	0	0	0	0	0	0	0	0	0	0	0	0	0	0	0	0	0
Botryostrobus auritus-australis (Ehrenberg) group Nigrini, 1977	Artostrobiidae	Nassellaria	0	0	0	0	0	0	0	0	0	1	0	0	4	0	0	0	0	0	0	0	1	0	0	1	0	0	0	0	0	0	0	0	0	0	0	0	0	0	0	0	0	0	0	0	0	0	0
Carpocanistrum cyclindricum Haeckel, 1887	Carpocaniidae	Nassellaria	0	0	0	0	0	0	0	0	0	0	0	0	0	0	1	0	0	0	0	0	0	0	0	0	0	0	0	0	0	0	0	0	0	0	0	0	0	0	0	0	0	0	0	0	0	0	0
Carpocanistrum sp.	Carpocaniidae	Nassellaria	0	0	0	0	1	1	1	0	1	3	3	2	2	0	3	0	2	0	2	2	3	0	1	0	0	0	0	0	0	0	0	0	0	0	0	0	0	0	0	0	0	0	0	0	0	0	0
Carpocanopsis obovata Tan et Su, 1982	Carpocaniidae	Nassellaria	0	0	0	0	0	1	0	0	0	0	0	0	0	0	0	0	0	0	0	0	0	0	0	0	0	0	0	0	0	0	0	0	0	0	0	0	0	0	0	0	0	0	0	0	0	0	0
Cenellipsis ellipticum Chen, 1987	Actinommidae	Spumellaria	0	0	0	0	0	0	0	0	0	0	0	0	0	0	0	0	0	0	0	0	1	0	0	0	0	0	0	0	0	0	0	0	0	0	0	0	0	0	0	0	0	0	0	0	0	0	0
Cenosphaera elysia Haeckel, 1887	Actinommidae	Spumellaria	0	0	0	0	0	0	0	0	0	3	0	0	0	0	0	0	0	0	0	0	0	0	0	0	0	0	0	0	0	0	0	0	0	0	0	0	0	0	0	0	0	0	0	0	0	0	0
Cenosphaera riedeli Blueford, 1982	Actinommidae	Spumellaria	1	0	0	0	0	0	0	0	1	0	0	5	1	0	0	0	0	0	0	0	2	0	0	0	0	0	0	0	0	0	0	0	0	0	0	0	0	0	0	0	0	0	0	0	0	0	0
Cenosphaera setosa Ehrenberg, 1872	Actinommidae	Spumellaria	0	0	0	0	0	0	0	0	0	0	0	0	0	0	0	0	1	0	0	0	0	0	0	0	0	0	0	0	0	0	0	0	0	0	0	0	0	0	0	0	0	0	0	0	0	0	0
Cenosphaera sp.	Actinommidae	Spumellaria	0	0	0	0	0	0	0	0	0	0	0	0	0	0	0	0	0	0	0	0	1	0	0	0	0	0	0	0	0	0	0	0	0	0	0	0	0	0	0	0	0	0	0	0	0	0	0
Centrobotrys thermophila Petrushevskaya, 1965	Cannobotryidae	Nassellaria	0	0	0	0	0	0	0	0	0	0	0	0	0	0	0	0	0	0	1	0	0	0	1	0	0	0	0	0	0	0	0	0	0	0	0	0	0	0	0	0	0	0	0	0	0	0	0
Clathrocanium diadema Haeckel, 1887	Plagiacanthidae	Nassellaria	0	0	0	0	0	0	0	0	0	0	1	0	0	0	2	0	0	0	0	0	0	0	0	0	0	0	0	0	0	0	0	0	0	0	0	0	0	0	0	0	0	0	0	0	0	0	0
Collosphaera elliptica Chen and Tan, 1989	Collosphaeridae	Collodaria	0	0	0	0	0	0	1	0	0	0	0	0	0	0	0	0	0	0	0	0	0	0	0	0	0	0	0	0	0	0	0	0	0	0	0	0	0	0	0	0	0	0	0	0	0	0	0
Collosphaera sp.	Collosphaeridae	Collodaria	0	0	0	0	0	0	0	0	0	1	0	0	0	0	0	0	0	0	0	0	0	0	0	0	0	0	0	0	0	0	0	0	0	0	0	0	0	0	0	0	0	0	0	0	0	0	0
Collosphaera tuberosa Haeckel, 1887	Collosphaeridae	Collodaria	0	0	0	0	1	0	0	0	0	0	0	0	0	0	0	0	0	0	0	0	0	0	0	0	0	0	0	0	0	0	0	0	0	0	0	0	0	0	0	0	0	0	0	0	0	0	0
Cornutella profunda Ehrenberg, 1854	Theoperidae	Nassellaria	0	0	0	0	0	0	0	0	0	0	0	0	1	0	0	0	0	0	0	0	1	0	0	0	0	0	0	0	0	0	0	0	0	0	0	0	0	0	0	0	0	0	0	0	0	0	0
Cycladophora bicornis (Popofsky, 1908)	Theoperidae	Nassellaria	0	0	0	0	0	0	0	1	0	0	0	2	0	0	1	0	0	0	0	0	1	0	0	0	0	0	0	0	0	0	0	0	0	0	0	0	0	0	0	0	0	0	0	0	0	0	0
Cycladophora davisian (Ehrenberg, 1861)	Theoperidae	Nassellaria	0	0	0	0	0	0	0	0	0	0	0	0	0	0	0	0	2	0	0	0	0	0	0	0	0	0	0	0	0	0	0	0	0	0	0	0	0	0	0	0	0	0	0	0	0	0	0
Cypassis irregularis Nigrini, 1968	Coccodiscidae	Spumellaria	0	0	0	2	0	0	0	0	1	0	1	4	0	0	0	0	3	0	0	0	0	0	1	0	0	1	0	2	0	0	0	0	0	0	0	0	0	0	0	0	0	0	0	0	0	0	0
Cypassis puella Haeckel, 1887	Coccodiscidae	Spumellaria	0	0	0	0	0	0	0	0	0	0	0	0	0	0	0	0	0	0	0	0	0	0	2	0	0	0	0	0	0	0	0	0	0	0	0	0	0	0	0	0	0	0	0	0	0	0	0
Dictyocoryne group	Spongodiscidae	Spumellaria	2	3	4	9	5	8	4	9	21	22	16	29	16	0	12	5	31	2	30	20	8	1	3	6	0	0	0	0	0	0	0	0	0	1	0	0	0	0	0	0	0	0	1	0	0	0	0
Dictyophimus infabricatus Nigrini, 1968	Theoperidae	Nassellaria	0	0	0	0	0	0	0	0	0	0	0	0	0	0	5	0	0	0	0	0	0	0	0	0	0	0	0	0	0	0	0	0	0	0	0	0	0	0	0	0	0	0	0	0	0	0	0
Didymocyrtis tetrathalamus (Haeckel, 1887)	Coccodiscidae	Spumellaria	13	17	13	37	23	21	14	38	32	24	39	64	51	2	32	4	53	2	7	41	8	11	18	6	0	2	3	10	1	0	0	0	0	0	1	0	0	0	0	0	0	0	1	0	0	0	0
Disolenia zanguebarica Ehrenberg, 1872	Collosphaeridae	Collodaria	0	0	0	0	0	0	0	0	0	0	0	1	0	0	0	0	0	0	0	0	0	0	0	0	0	0	0	0	0	0	0	0	0	0	0	0	0	0	0	0	0	0	0	0	0	0	0
Druppatractus irregularia Popofsky, 1912	Actinommidae	Spumellaria	0	0	0	0	0	0	0	0	0	0	0	1	1	0	1	0	4	0	0	0	0	0	0	0	0	0	0	0	0	0	0	0	0	0	0	0	0	0	0	0	0	0	0	0	0	0	0
Druppatractus sp.	Actinommidae	Spumellaria	0	0	0	0	0	0	0	0	0	0	0	0	0	0	0	0	0	0	0	0	1	0	0	0	0	0	0	0	0	0	0	0	0	0	0	0	0	0	0	0	0	0	0	0	0	0	0
Druppatractus testudo (Ehrenberg, 1872)	Actinommidae	Spumellaria	0	0	0	0	0	0	0	0	0	0	0	0	0	0	0	0	0	0	0	0	2	0	0	0	0	0	0	0	0	0	0	0	0	0	0	0	0	0	0	0	0	0	0	0	0	0	0
Euchitonia furcata Ehrenberg, 1872	Spongodiscidae	Spumellaria	4	1	0	4	6	8	3	2	13	12	4	8	8	0	4	1	19	4	11	9	4	2	1	0	1	2	0	1	0	1	0	0	0	0	0	0	0	0	0	0	0	0	0	0	1	0	0
Euchitonia sp.	Spongodiscidae	Spumellaria	2	1	1	2	4	0	4	0	7	3	3	5	0	0	1	0	9	2	6	7	10	3	0	0	0	1	0	0	0	0	0	0	0	0	0	0	0	0	0	0	0	0	0	0	0	0	0
Euchitonia triangulum Ehrenberg, 1873	Spongodiscidae	Spumellaria	4	0	3	3	1	5	3	1	2	1	0	3	2	0	2	1	2	0	0	0	0	0	0	0	0	0	0	0	0	0	0	0	0	0	0	0	0	0	0	0	0	0	0	0	0	0	0
Eucyrtidium acuminatum (Ehrenberg, 1844)	Theoperidae	Nassellaria	0	0	0	0	0	0	0	0	0	0	0	0	2	0	1	0	1	0	0	0	0	0	0	0	0	0	0	0	0	0	0	0	0	0	0	0	0	0	0	0	0	0	0	0	0	0	0
Eucyrtidium anomalum Haeckel,1862	Theoperidae	Nassellaria	0	0	0	0	0	0	0	0	0	0	0	0	1	0	0	0	2	0	0	0	0	0	0	0	0	0	0	0	0	0	0	0	0	0	0	0	0	0	0	0	0	0	0	0	0	0	0
Eucyrtidium hexagonatum Haeckel,1887	Theoperidae	Nassellaria	0	0	0	0	0	0	0	0	0	0	0	0	0	0	0	0	4	0	0	0	0	0	0	0	0	0	0	0	0	0	0	0	0	0	0	0	0	0	0	0	0	0	0	0	0	0	0
Eucyrtidium sp.	Theoperidae	Nassellaria	0	0	0	0	0	0	0	0	0	0	0	0	0	0	1	0	0	0	0	0	0	0	0	0	0	0	0	0	0	0	0	0	0	0	0	0	0	0	0	0	0	0	0	0	0	0	0
Flustrella polygonia (Popofsky, 1912)	Spongodiscidae	Spumellaria	0	0	0	0	0	1	0	0	0	2	0	0	2	0	0	1	6	0	0	0	1	0	0	0	0	0	0	0	0	0	0	0	0	0	0	0	0	0	0	0	0	0	0	0	0	0	0
Haliommetta miocenica (Campbell and Clark, 1944)	Actinommidae	Spumellaria	0	0	0	0	0	0	0	0	0	0	0	0	0	0	1	0	0	0	0	0	0	0	0	0	0	0	0	0	0	0	0	0	0	0	0	0	0	0	0	0	0	0	0	0	0	0	0
Heliodiscus asteriscus Haeckel, 1887	Heliodiscidae	Spumellaria	0	0	0	1	2	0	0	1	3	3	4	2	3	0	0	0	1	0	0	0	0	0	0	0	0	0	0	0	0	0	0	0	0	0	0	0	0	0	0	0	0	0	0	0	0	0	0
Heliodiscus sp.	Heliodiscidae	Spumellaria	0	0	0	0	0	0	0	4	0	3	0	0	1	0	2	0	2	0	0	1	0	0	0	0	0	0	0	0	0	0	0	0	0	0	0	0	0	0	0	0	0	0	0	0	0	0	0
Heliosphaera octacantha Mast, 1910	Actinommidae	Spumellaria	0	0	0	0	0	0	0	0	0	0	0	0	0	0	0	0	1	0	0	0	0	0	0	0	0	0	0	0	0	0	0	0	0	0	0	0	0	0	0	0	0	0	0	0	0	0	0
Heliosphaera radiata Popofsky, 1912	Actinommidae	Spumellaria	0	0	0	0	0	0	0	0	0	0	0	0	2	0	0	0	0	0	0	0	0	0	0	0	0	0	0	0	0	0	0	0	0	0	0	0	0	0	0	0	0	0	0	0	0	0	0
Helotholus histricosa Jørgensen, 1905	Plagiacanthidae	Nassellaria	0	0	0	1	0	0	0	0	0	0	0	0	0	0	0	0	0	0	0	0	0	0	0	0	0	0	0	0	0	0	0	0	0	0	0	0	0	0	0	0	0	0	0	0	0	0	0
Hexacontium axotrias Haeckel, 1887	Actinommidae	Spumellaria	2	0	0	0	1	0	0	1	0	1	0	0	1	0	0	0	2	0	0	0	1	2	0	0	0	0	0	0	0	0	0	0	0	0	0	0	0	0	0	0	0	0	0	0	0	0	0
Hexacontium enthacanthum Jørgensen, 1899	Actinommidae	Spumellaria	0	0	0	0	0	0	1	1	0	0	0	0	0	0	2	0	0	0	0	0	0	0	0	0	0	0	0	0	0	0	0	0	0	0	0	0	0	0	0	0	0	0	0	0	0	0	0
Hexacontium pachydermum Jorgensen, 1899	Actinommidae	Spumellaria	6	1	0	1	1	0	3	5	0	3	1	0	0	0	0	0	0	0	0	0	1	2	4	1	0	0	0	2	0	0	0	0	0	0	0	0	0	0	0	0	0	0	0	0	0	0	0
Hexacontium quadratum Tan, 1993	Actinommidae	Spumellaria	1	0	0	1	1	0	1	0	0	0	0	0	2	0	1	0	0	0	0	0	0	0	0	0	0	1	0	0	0	0	0	0	0	0	0	0	0	0	0	0	0	0	0	0	0	0	0
Hexacontium hexagonum Ehrenberg, 1854	Actinommidae	Spumellaria	0	0	0	0	0	0	0	0	0	0	1	0	0	0	1	0	0	0	0	0	0	0	0	0	0	0	0	0	0	0	0	0	0	0	0	0	0	0	0	0	0	0	0	0	0	0	0
Hexacontium sp.	Actinommidae	Spumellaria	0	0	0	0	0	0	0	1	1	0	0	0	0	0	0	0	2	0	0	0	0	0	0	0	0	0	0	0	0	0	0	0	0	0	0	0	0	0	0	0	0	0	0	0	0	0	0
Hexapyle sp.	Pyloniidae	Spumellaria	0	0	0	0	0	0	0	0	0	0	0	0	0	0	3	0	0	0	0	0	0	0	0	0	0	0	0	0	0	0	0	0	0	0	0	0	0	0	0	0	0	0	0	0	0	0	0
Hexapyle spinulosa Chen and Tan, 1889	Pyloniidae	Spumellaria	1	1	0	0	0	1	0	0	1	1	3	4	0	0	0	0	2	0	3	2	0	0	0	1	0	0	0	0	0	0	0	0	0	0	0	0	0	0	0	0	0	0	0	0	0	0	0
Hymeniastrum euclidis Haeckel, 1887	Spongodiscidae	Spumellaria	0	0	2	0	0	0	0	0	0	0	0	5	5	0	0	0	8	0	0	1	0	0	0	0	0	0	0	0	0	0	0	0	0	0	0	0	0	0	0	0	0	0	0	0	0	0	0
Hymeniastrum sp.	Spongodiscidae	Spumellaria	0	0	0	0	2	1	0	0	0	0	0	0	0	0	0	0	0	0	0	0	0	0	0	0	0	0	0	0	0	0	0	0	0	0	0	0	0	0	0	0	0	0	0	0	0	0	0
Lamprocyclas maritalis Haeckel, 1887	Pterocorythidae	Nassellaria	0	0	0	0	0	0	0	0	0	0	0	0	1	0	0	0	0	0	0	0	0	0	0	0	0	0	0	0	0	0	0	0	0	0	0	0	0	0	0	0	0	0	0	0	0	0	0
Lamprocyrtis nigriniae (Caulet, 1971)	Pterocorythidae	Nassellaria	0	0	0	0	0	0	0	0	0	0	0	0	1	0	0	0	0	0	0	0	0	0	0	0	0	0	0	0	0	0	0	0	0	0	0	0	0	0	0	0	0	0	0	0	0	0	0
Larcopyle buetschlii Dreyer, 1889	Litheliidae	Spumellaria	0	0	0	0	0	0	0	0	0	0	0	0	5	1	3	0	1	0	0	1	0	0	0	0	0	0	0	0	0	0	0	0	0	0	0	0	0	0	0	0	0	0	0	0	0	0	0
Larcopyle sp.	Litheliidae	Spumellaria	0	0	0	0	0	0	0	0	0	0	0	1	0	0	0	0	0	0	0	0	0	0	0	0	0	0	0	0	0	0	0	0	0	0	0	0	0	0	0	0	0	0	0	0	0	0	0
Larcospira quadrangula Haeckel, 1887	Litheliidae	Spumellaria	0	1	0	0	1	0	1	1	2	5	5	1	1	0	3	1	1	0	5	2	0	0	0	0	0	0	0	0	0	0	0	0	0	0	0	0	0	0	0	0	0	0	0	0	0	0	0
Lipmanella dictyoceras (Haeckel, 1861)	Theoperidae	Nassellaria	0	0	1	0	0	0	0	0	0	0	0	0	0	0	0	0	0	0	0	1	0	0	0	0	0	0	0	0	0	0	0	0	0	0	0	0	0	0	0	0	0	0	0	0	0	0	0
Lithelius alveolina Haeckel,1862	Litheliidae	Spumellaria	0	0	0	0	1	0	0	0	0	0	0	0	0	0	0	0	0	0	0	0	0	0	0	0	0	0	0	0	0	0	0	0	0	0	0	0	0	0	0	0	0	0	0	0	0	0	0
Lithelius foremanae Sanfilippo et Riedel, 1973	Litheliidae	Spumellaria	0	0	0	0	0	0	0	0	0	0	0	0	1	0	0	0	0	0	0	0	0	0	0	0	0	0	0	0	0	0	0	0	0	0	0	0	0	0	0	0	0	0	0	0	0	0	0
Lithelius minor Jörgensen, 1900	Litheliidae	Spumellaria	0	0	0	0	3	1	1	6	5	1	2	4	1	0	1	0	1	0	0	2	5	0	0	0	0	0	0	1	0	0	0	0	0	0	0	0	0	0	0	0	0	0	0	0	0	0	0
Lithelius nautiloides Popofsky, 1908	Litheliidae	Spumellaria	0	0	1	0	1	0	2	1	5	0	0	1	6	0	0	1	2	0	0	0	0	0	0	0	0	0	0	0	0	0	0	0	0	0	0	0	0	0	0	0	0	0	0	0	0	0	0
Lithelius nerites Tan and Su, 1982	Litheliidae	Spumellaria	0	0	0	0	0	1	0	0	0	0	0	0	0	0	0	1	0	1	0	0	0	0	0	0	0	0	0	0	0	0	0	0	0	0	0	0	0	0	0	0	0	0	0	0	0	0	0
Lithelius sp.	Litheliidae	Spumellaria	0	0	0	0	0	0	0	2	5	0	3	0	6	0	5	0	2	0	6	3	6	0	2	2	0	0	0	0	0	0	0	0	0	0	0	0	0	0	0	0	0	0	1	0	0	0	0
Lithelius spiralis Haeckel, 1862	Litheliidae	Spumellaria	0	0	0	0	0	0	0	1	0	2	2	0	0	0	0	0	2	0	0	0	0	0	0	0	0	0	0	0	0	0	0	0	0	0	0	0	0	0	0	0	0	0	0	1	0	0	0
Lithelius xanthiformis Tan and Su, 1982	Litheliidae	Spumellaria	0	1	0	0	0	0	3	1	3	4	1	2	4	0	0	0	2	0	2	4	9	0	0	0	0	0	0	0	0	0	0	0	0	0	0	0	0	0	0	0	0	0	0	0	0	0	0
Peromelissa sp.	Plagiacanthidae	Nassellaria	0	0	0	0	0	0	0	0	0	0	0	0	0	0	0	0	0	0	0	0	0	0	1	0	0	0	0	0	0	0	0	0	0	0	0	0	0	0	0	0	0	0	0	0	0	0	0
Peromelissa spinosissima Tan and Tchang, 1976	Plagiacanthidae	Nassellaria	2	2	4	1	2	12	2	3	0	0	0	0	0	0	11	0	0	0	0	0	0	1	0	1	0	4	3	1	0	0	0	0	0	0	0	0	0	0	0	0	0	0	0	0	0	0	0
Peromelissa thoracites Haeckel, 1862	Plagiacanthidae	Nassellaria	1	0	0	0	0	8	0	1	0	0	0	0	1	0	1	0	1	0	2	0	0	0	0	0	0	0	0	0	0	0	0	0	0	0	0	0	0	0	0	0	0	0	0	0	0	0	0
Lophophaena cylindrica (Cleve, 1900)	Plagiacanthidae	Nassellaria	1	0	0	0	0	0	0	0	0	0	0	0	0	0	0	0	0	0	0	0	0	0	0	0	0	0	0	0	0	0	0	0	0	0	0	0	0	0	0	0	0	0	0	0	0	0	0
Lophospyris pentagona hyperborea (Jørgensen, 1905)	Trissocyclidae	Nassellaria	0	0	0	0	0	0	0	0	0	0	0	0	0	0	0	0	0	0	1	0	0	0	0	0	0	0	0	0	0	0	0	0	0	0	0	0	0	0	0	0	0	0	0	0	0	0	0
Neosemantis distephanus Popofsky, 1913	Plagiacanthidae	Nassellaria	0	0	0	2	0	0	0	0	0	0	0	0	1	0	0	0	0	0	0	0	0	0	0	0	0	0	0	0	0	0	0	0	0	0	0	0	0	0	0	0	0	0	0	0	0	0	0
Otosphaera auriculata Haeckel, 1887	Collosphaeridae	Collodaria	0	0	0	0	0	0	0	0	0	0	0	0	1	0	0	0	0	0	0	0	0	0	0	0	0	0	0	0	0	0	0	0	0	0	0	0	0	0	0	0	0	0	0	0	0	0	0
Peridium longispinum Jørgensen, 1900	Plagiacanthidae	Nassellaria	0	0	0	0	0	0	0	0	0	0	0	0	1	0	0	0	0	0	0	0	0	0	0	0	0	0	0	0	0	0	0	0	0	0	0	0	0	0	0	0	0	0	0	0	0	0	0
Peridium sp.	Plagiacanthidae	Nassellaria	0	0	0	0	0	0	0	0	0	0	0	0	0	0	1	0	0	0	0	0	0	0	0	0	0	0	0	0	0	0	0	0	0	0	0	0	0	0	0	0	0	0	0	0	0	0	0
Phormospyris stabilis stabilis (Goll, 1968)	Trissocyclidae	Nassellaria	0	0	0	0	0	0	0	0	0	0	0	0	0	0	0	0	1	0	0	0	0	0	0	0	0	0	0	0	0	0	0	0	0	0	0	0	0	0	0	0	0	0	0	0	0	0	0
Phorticium polycladum Tan and Tchang, 1976	Pyloniidae	Spumellaria	0	0	0	0	0	0	2	5	4	5	2	0	6	2	9	1	8	0	7	8	1	1	0	1	0	0	0	3	0	0	0	0	0	0	0	0	0	0	0	0	0	0	0	0	0	0	0
Phorticium pylonium Haeckel, 1887	Pyloniidae	Spumellaria	0	0	0	0	0	2	2	21	23	7	9	14	14	0	17	2	11	0	4	17	4	0	0	4	0	1	0	2	0	0	0	0	0	0	0	0	0	0	0	0	0	0	0	0	0	0	0
Phorticium sp.	Pyloniidae	Spumellaria	0	0	0	0	0	0	0	0	0	0	0	7	14	0	16	0	7	0	7	8	3	0	2	0	0	0	0	0	0	0	0	0	0	0	0	0	0	0	0	0	0	0	0	0	0	0	0
Plectopyramis sp.	Theoperidae	Nassellaria	0	0	0	0	0	0	0	0	0	0	0	0	0	0	0	0	0	0	0	0	1	0	0	0	0	0	0	0	0	0	0	0	0	0	0	0	0	0	0	0	0	0	0	0	0	0	0
Pseudocubus obeliscus Haeckel, 1887	Plagiacanthidae	Nassellaria	4	1	13	4	2	38	7	3	5	0	0	0	1	1	17	1	1	1	4	5	1	1	4	0	1	9	2	10	2	1	0	0	0	0	0	0	0	0	0	0	0	0	0	0	0	0	0
Pterocanium praetextum (Ehrenberg, 1872)	Theoperidae	Nassellaria	0	1	0	2	3	2	0	3	0	1	0	6	2	0	4	0	5	0	2	2	0	0	0	0	0	0	0	0	0	0	0	0	0	0	0	0	0	0	0	0	0	0	0	0	0	0	0
Pterocanium trilobum (Haeckel, 1862)	Theoperidae	Nassellaria	1	0	0	0	1	1	0	4	3	2	0	0	4	0	6	0	3	0	0	2	0	1	1	0	0	1	0	0	0	0	0	0	0	0	0	0	0	0	0	0	0	0	0	0	0	0	0
Pterocorys campanula Haeckel, 1887	Pterocorythidae	Nassellaria	0	0	0	0	0	4	0	0	1	0	0	3	2	0	4	0	12	0	1	7	1	0	0	0	0	0	0	0	0	0	0	0	0	0	0	0	0	0	0	0	0	0	0	0	0	0	0
Pterocorys hertwigii (Haeckel, 1887)	Pterocorythidae	Nassellaria	0	0	0	0	0	1	0	0	0	0	0	0	5	0	1	0	1	0	0	0	0	0	2	0	0	0	0	0	0	0	0	0	0	0	0	0	0	0	0	0	0	0	0	0	0	0	0
Pterocorys sp.	Pterocorythidae	Nassellaria	0	0	0	0	0	0	0	0	0	0	0	0	0	0	6	0	0	0	0	0	0	0	0	0	0	0	0	0	0	0	0	0	0	0	0	0	0	0	0	0	0	0	0	0	0	0	0
Pylodiscus triangularis Haeckel, 1887	Pyloniidae	Spumellaria	0	0	0	0	0	0	0	0	0	0	0	0	0	0	0	0	0	0	0	1	0	0	0	0	0	0	0	0	0	0	0	0	0	0	0	0	0	0	0	0	0	0	0	0	0	0	0
Pylolena hexagona Chen and Tan, 1989	Pyloniidae	Spumellaria	0	0	0	0	0	0	0	0	0	0	0	0	1	0	0	0	0	0	0	0	0	0	0	0	0	0	0	0	0	0	0	0	0	0	0	0	0	0	0	0	0	0	0	0	0	0	0
Sethodiscus macrococcus Haeckel, 1887	Heliodiscidae	Spumellaria	0	1	0	0	0	0	0	1	0	0	0	3	3	0	0	0	0	0	0	0	0	0	0	0	0	0	0	0	0	0	0	0	0	0	0	0	0	0	0	0	0	0	0	0	0	0	0
Siphonosphaera martensi Brandt, 1905	Collosphaeridae	Collodaria	0	0	0	0	0	0	0	0	0	0	0	0	1	0	0	0	0	0	0	0	1	0	0	0	0	0	0	1	0	0	0	0	0	0	0	0	0	0	0	0	0	0	0	0	0	0	0
Siphonosphaera polysiphonia Haeckel, 1887	Collosphaeridae	Collodaria	0	0	0	0	0	0	0	0	0	0	0	0	1	0	0	1	0	0	0	0	0	0	1	0	0	0	0	0	0	0	0	0	0	0	0	0	0	0	0	0	0	0	0	0	0	0	0
Spongaster tetras Ehrenberg, 1860	Spongodiscidae	Spumellaria	2	1	2	8	8	3	5	5	4	16	7	13	17	0	5	6	26	1	16	23	3	4	9	3	0	2	0	2	0	0	0	0	0	0	0	0	0	0	0	0	0	0	2	0	0	0	0
Spongurus cylindricus Haeckel, 1861	Spongodiscidae	Spumellaria	0	0	0	0	0	0	0	0	0	0	1	0	0	0	0	0	0	0	0	0	0	0	0	0	0	0	0	0	0	0	0	0	0	0	0	0	0	0	0	0	0	0	0	0	0	0	0
Spongodiscus biconcavus Haeckel, 1887	Spongodiscidae	Spumellaria	6	2	3	7	3	14	2	2	3	0	1	3	4	0	3	0	5	0	3	5	1	3	4	2	2	12	0	12	0	0	0	0	0	0	0	0	0	0	0	0	0	0	1	1	0	0	0
Spongodiscus resurgens Ehrenberg, 1854	Spongodiscidae	Spumellaria	8	12	3	7	4	7	9	7	9	3	13	6	8	0	10	0	17	4	15	8	3	15	20	6	0	7	0	20	0	0	0	0	0	0	0	0	0	0	0	0	0	0	0	0	0	0	0
Spongodiscus sp.	Spongodiscidae	Spumellaria	2	0	0	0	1	2	1	2	1	1	3	2	6	0	5	3	5	3	10	6	1	6	4	7	0	2	4	11	1	2	0	0	0	0	0	0	0	0	0	0	0	0	2	1	3	0	0
Spongophacus flos Tan and Su, 1982	Spongodiscidae	Spumellaria	0	0	0	0	0	0	0	0	0	1	1	0	0	0	0	0	0	0	1	0	0	0	0	0	0	0	5	0	0	0	0	0	0	0	0	0	0	0	0	0	0	0	0	0	0	0	0
Spongotrochus glacialis Popofsky, 1908	Spongodiscidae	Spumellaria	0	0	0	1	1	1	0	0	0	0	0	0	1	0	2	0	0	0	0	1	0	0	0	0	0	0	0	0	0	0	0	0	0	0	0	0	0	0	0	0	0	0	0	0	0	0	0
Stichopilium rapaeformis Popofsky, 1913	Pterocorythidae	Nassellaria	0	0	0	0	0	0	2	2	0	0	0	1	1	0	1	0	0	0	0	0	0	0	0	0	0	0	0	0	0	0	0	0	0	0	0	0	0	0	0	0	0	0	0	0	0	0	0
Stichopilium sp.	Theoperidae	Nassellaria	0	0	0	0	0	0	2	0	0	0	0	1	0	0	0	0	0	0	0	0	0	0	0	0	0	0	0	0	0	0	0	0	0	0	0	0	0	0	0	0	0	0	0	0	0	0	0
Stichopilium thoracopterum Haeckel, 1887	Pterocorythidae	Nassellaria	0	0	0	0	1	2	0	0	0	0	0	0	0	0	0	0	0	0	0	0	0	0	0	0	0	0	0	0	0	0	0	0	0	0	0	0	0	0	0	0	0	0	0	0	0	0	0
Sphaeropylolena sp.	Pyloniidae	Spumellaria	0	0	0	1	2	0	0	3	0	0	5	3	4	0	4	0	0	0	0	0	0	0	0	0	0	0	0	0	0	0	0	0	0	0	0	0	0	0	0	0	0	0	0	0	0	0	0
Stylochlamydium sp.	Spongodiscidae	Spumellaria	0	0	0	0	0	0	0	0	0	0	0	0	0	0	5	0	0	0	0	0	0	0	0	0	0	0	0	0	0	0	0	0	0	0	0	0	0	0	0	0	0	0	0	0	0	0	0
Stylochlamydium venustum (Bailey, 1856)	Spongodiscidae	Spumellaria	0	0	0	0	0	0	1	0	0	0	0	0	0	0	0	0	0	0	0	0	0	0	0	0	0	0	0	0	0	0	0	0	0	0	0	0	0	0	0	0	0	0	0	0	0	0	0
Stylodictya aculeate Joergensen, 1905	Spongodiscidae	Spumellaria	0	0	0	0	0	1	0	0	0	1	1	0	0	1	1	0	0	0	0	0	0	0	0	0	0	0	0	0	0	0	0	0	0	0	0	0	0	0	0	0	0	0	0	0	0	0	0
Stylodictya dujardinii Haeckel, 1862	Spongodiscidae	Spumellaria	0	0	0	0	0	0	0	1	0	0	0	0	0	0	0	0	0	0	0	0	0	0	0	0	0	0	0	0	0	0	0	0	0	0	0	0	0	0	0	0	0	0	0	0	0	0	0
Stylodictya multispina Haeckel, 1862	Spongodiscidae	Spumellaria	0	0	0	0	3	6	5	6	22	16	9	9	5	0	9	5	12	1	30	20	6	3	0	0	0	1	0	1	0	0	0	0	0	0	0	0	0	0	0	0	0	0	0	0	0	0	0
Stylodictya sp.	Spongodiscidae	Spumellaria	0	0	0	3	3	1	2	3	5	8	6	9	3	1	5	4	0	0	10	5	0	0	3	0	0	0	0	0	0	0	0	0	0	0	0	0	0	0	0	0	0	0	0	0	0	0	0
Stylodictya validispina Jørgensen, 1905	Spongodiscidae	Spumellaria	0	0	0	0	2	0	4	2	1	7	7	0	1	0	1	0	0	0	0	0	0	0	0	0	0	0	0	0	0	0	0	0	0	0	0	0	0	0	0	0	0	0	0	0	0	0	0
Tetrapyle octacantha group Müller, 1858	Pyloniidae	Spumellaria	265	215	103	235	417	262	395	487	365	260	221	215	195	6	174	18	166	2	137	162	20	71	210	185	8	66	13	250	3	1	0	0	0	0	0	0	0	0	0	0	0	0	12	4	6	1	0
Tetrapylonium pyrum Tan and Chen, 1990	Pyloniidae	Spumellaria	0	0	0	0	0	0	0	0	0	0	0	0	2	0	0	0	0	0	0	0	0	0	0	0	0	0	0	0	0	0	0	0	0	0	0	0	0	0	0	0	0	0	0	0	0	0	0
Tetrapylonium sp.	Pyloniidae	Spumellaria	1	0	0	0	4	7	5	7	8	3	0	7	5	0	4	0	5	0	0	3	0	2	7	3	0	0	1	2	0	0	0	0	0	0	0	0	0	0	0	0	0	0	0	0	0	0	0
Thecosphaera aequora Ehrenberg 1844	Actinommidae	Spumellaria	0	0	0	0	1	2	0	2	0	2	2	0	0	0	3	0	2	0	0	0	3	0	0	1	0	0	0	1	0	0	0	0	0	0	0	0	0	0	0	0	0	0	0	0	0	0	0
Lophophaena hispida (Ehrenberg, 1872)	Plagiacanthidae	Nassellaria	0	0	0	1	0	0	0	0	0	0	0	1	1	1	1	0	1	0	0	0	0	0	0	0	0	0	0	0	0	0	0	0	0	0	0	0	0	0	0	0	0	0	0	0	0	0	0
Theocorythium trachelium (Ehrenberg, 1872)	Pterocorythidae	Nassellaria	0	0	0	0	2	0	0	1	0	0	1	1	0	0	0	0	2	0	0	2	0	0	0	0	0	0	0	0	0	0	0	0	0	0	0	0	0	0	0	0	0	0	0	0	0	0	0
Theocorys veneris Haeckel, 1887	Theoperidae	Nassellaria	0	0	0	0	1	0	1	0	1	0	0	1	0	0	1	0	0	0	1	0	0	0	0	0	0	0	0	0	0	0	0	0	0	0	0	0	0	0	0	0	0	0	0	0	0	0	0
Theopilium tricostatum Haeckel, 1887	Theoperidae	Nassellaria	0	0	0	0	0	0	0	0	0	0	0	0	2	0	0	0	0	0	0	0	0	0	0	0	0	0	0	0	0	0	0	0	0	0	0	0	0	0	0	0	0	0	0	0	0	0	0
Tholospyris scaphipes (Haeckel, 1887)	Trissocyclidae	Nassellaria	0	0	0	0	0	0	0	0	0	0	0	0	0	0	2	0	0	0	0	0	0	0	0	0	0	0	0	0	0	0	0	0	0	0	0	0	0	0	0	0	0	0	0	0	0	0	0
Xiphobotrys clavata Tchang et Tan, 1965	Cannobotryidae	Nassellaria	0	0	0	1	0	1	1	0	0	0	0	0	1	0	0	0	0	0	0	0	0	0	1	0	0	1	0	0	0	0	0	0	0	0	0	0	0	0	0	0	0	0	1	0	0	0	0
Xiphobotrys sp.	Cannobotryidae	Nassellaria	0	2	1	1	0	0	2	0	0	0	0	0	0	0	1	0	0	0	0	0	0	0	0	0	0	0	0	0	0	0	0	0	0	0	0	0	0	0	0	0	0	0	0	0	0	0	0
Zygocircus capulosus Popofsky, 1913	Trissocyclidae	Nassellaria	2	1	0	0	0	0	0	0	0	1	0	0	0	0	0	0	0	0	0	1	0	1	0	0	0	0	0	0	0	0	0	0	0	0	0	0	0	0	0	0	0	0	0	0	0	0	0
Zygocircus longispinus Tan and Tchang, 1976	Trissocyclidae	Nassellaria	0	1	1	1	1	3	1	4	0	1	0	0	0	0	1	0	0	0	0	0	0	0	0	1	0	0	0	1	0	0	0	0	0	0	0	0	0	0	0	0	0	0	0	0	0	0	0
Zygocircus piscicaudatus group Popofsky, 1913	Trissocyclidae	Nassellaria	4	3	2	2	7	5	2	9	11	10	6	8	15	0	22	3	16	0	22	7	6	3	1	1	0	1	0	2	0	0	0	0	0	0	0	0	0	0	0	0	0	0	1	0	0	0	0
[truncated: 12 more columns]
